# Supplementary material
Source: PubMed Central journal article supplement (PMC3422697)
Supplement: supp_mol.112.078295_Supplemental_Figure_1.pdf [file supp_mol.112.078295_Supplemental_Figure_1.pdf]

Journal: Molecular Pharmacology

Authors: Elzbieta I. Stolarczyk, Cassandra J Reiling, Kerry A. Pickin, Ryan Coppage, Marc R. Knecht, and Christian M. Paumi

Title: *CK2 regulates MRP1 function via phosphorylation of Thr249*

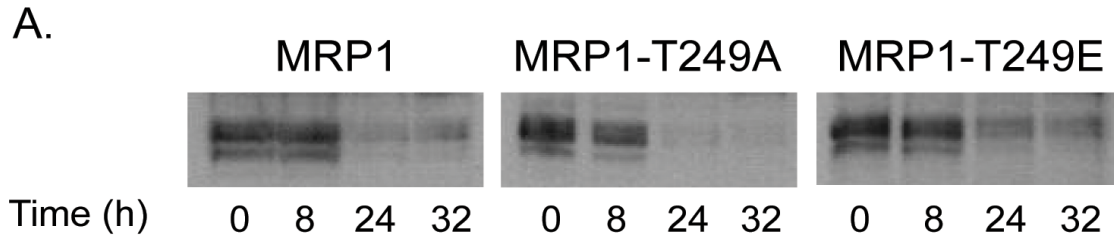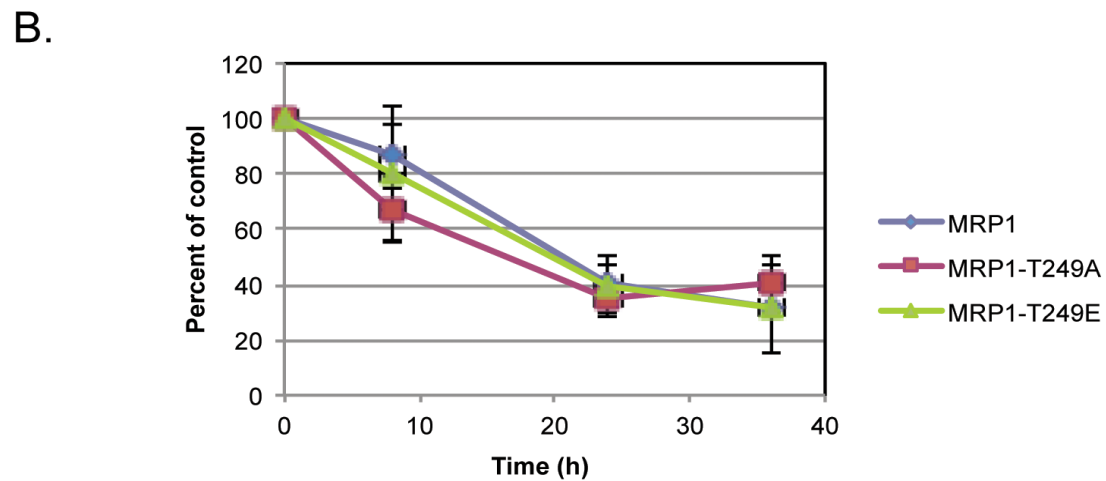

**Supplemental Figure 1. Stability of MRP1 protein is not affected by mutation of Thr249 to Ala or Glu.** MRP1, MRP1-T249A, and MRP1-T249E stability was assessed by cycloheximide (CHX) chase. MRP1, MRP1-T249A, and MRP1-T249E cells were treated with CHX as described in the Materials and Methods. Cell lysates were collected at 0, 8, 24, and 32 hours post CHX treatment and analyzed for MRP1 expression by Western blot (A). MRP1, MRP1-T249A, and MRP1-T249E expression levels from Supplemental Figure 1A were quantified for each time point and plotted as a percent of control (0 time point = 100%) (n=3).
